# Supplementary material for: Chirality-Dependent Interaction of d- and l-Menthol with Biomembrane Models
Source: Membranes (Basel). 2017 Dec 15;7(4):69. doi: 10.3390/membranes7040069 (PMC5746828; doi:10.3390/membranes7040069)
Supplement: Supplementary file 1 [file membranes-07-00069-s001.pdf]

# Electronic Supplementary Information

## Chirality-Dependent Interaction of d- and l-Menthol with Biomembrane Models

Pooja Gusain <sup>1</sup>, Shinya Ohki <sup>1</sup>, Kunihide Hoshino <sup>1,2</sup>, Yoshio Tsujino <sup>1,2</sup>, Naofumi Shimokawa <sup>1</sup>, and Masahiro Takagi <sup>\*1</sup>

<sup>1</sup> School of Materials Science, Japan Advanced Institute of Science and Technology, 1-1 Asahidai, Nomi, Ishikawa 923-1292, Japan.

<sup>2</sup> Takasago International Corporation, 5-37-1, Kamata, Ota-ku, Tokyo 144-8721, Japan.

### NMR Spectroscopy

The <sup>13</sup>C-NMR spectrum of DOPC titrated with d- or l-menthol at 15 °C is shown in Figure S3. As the concentration of d-menthol increased, the peak at 70.4 ppm, corresponding to the carbon at the g2 position of DOPC, remained unchanged. On the other hand, this peak became less intense as the l-menthol concentration was increased. In addition, the peak at 71.57 ppm, which corresponds to C1 of menthol, intensified compared to when d-menthol was added. Since the carbon at the g2 position is located in the hydrophilic region of DOPC, there is a hydrophilic interaction between l-menthol and DOPC.

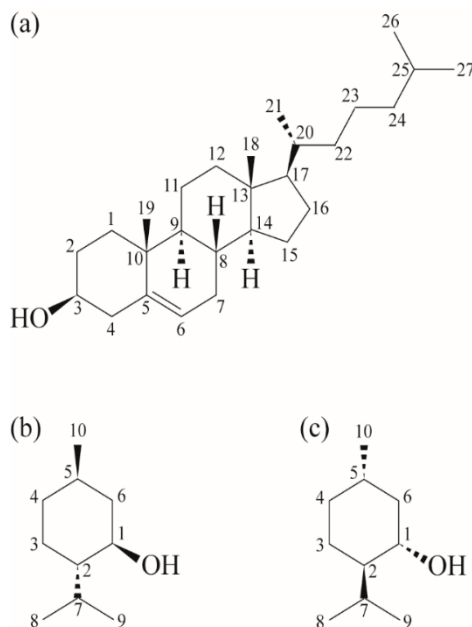

**Figure S1.** Systematic numbering of the chemical structures of (a) Chol, (b) l-menthol, and (c) d-menthol.

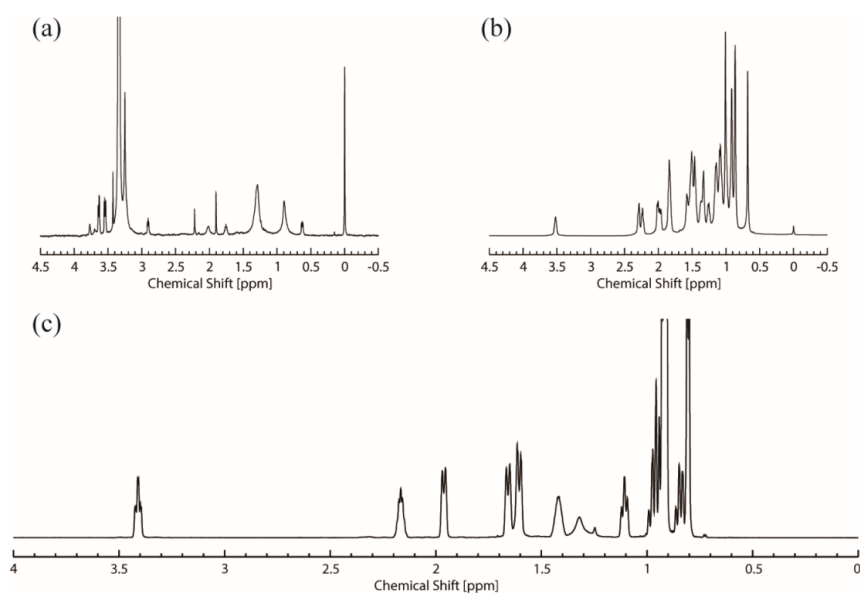

**Figure S2.**  $^1\text{H}$ -NMR spectra of (a) DOPC, (b) Chol, and (c) menthol.

| Component      | $^1\text{H}$ -site | Chemical Shift (ppm) |
|----------------|--------------------|----------------------|
| <b>DOPC</b>    | C18                | 0.895                |
|                | $\alpha$           | 3.42                 |
|                | C9 and C10         | 1.90                 |
|                | $(\text{CH}_2)_n$  | 1.30                 |
|                | C1                 | 2.01                 |
| <b>Chol</b>    | C26-27             | 0.88                 |
|                | C25                | 1.56                 |
| <b>Menthol</b> | C1                 | 3.41                 |
|                | C6                 | 1.96                 |
|                | C7                 | 2.16                 |
|                | C8                 | 0.93                 |
|                | C9                 | 0.809                |
|                | C10                | 0.90                 |
|                | C5                 | 1.41                 |

**Table S1.**  $^1\text{H}$  chemical shift values for DOPC, Chol, and menthol at 15 °C. Since there are no significant differences in chemical shifts between d- and l-menthol, only the results for l-menthol are shown.

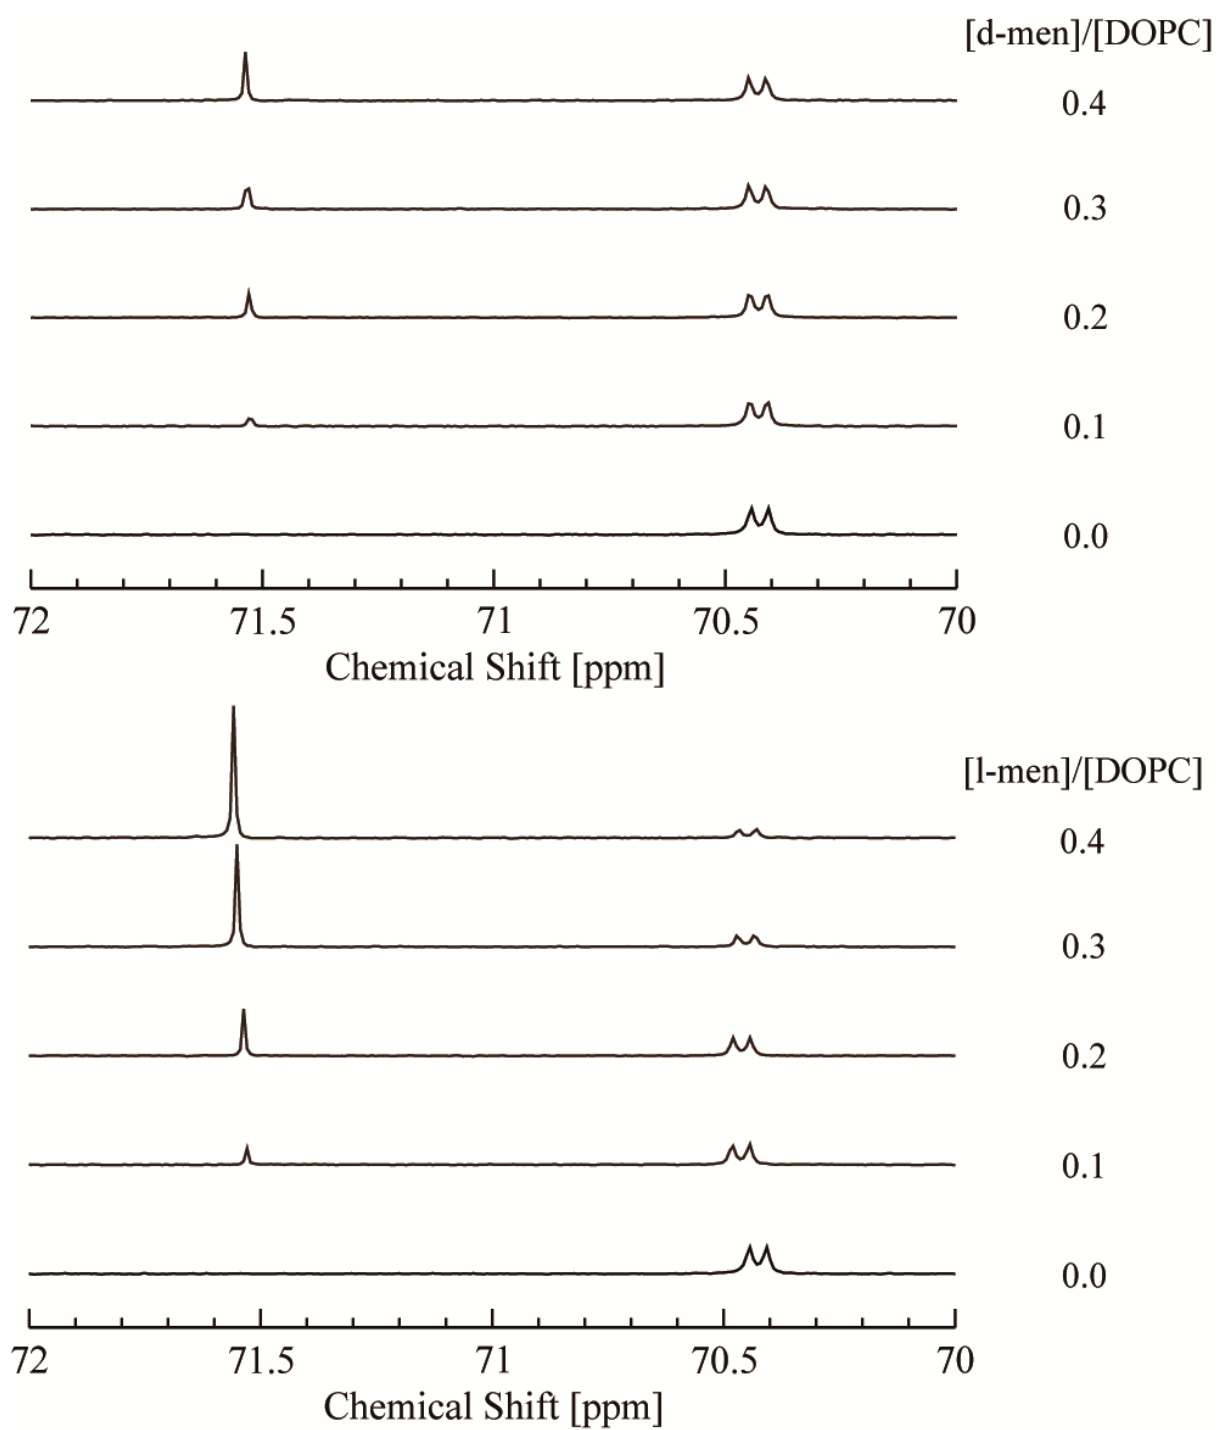

**Figure S3.**  $^{13}\text{C}$ -NMR spectra of DOPC titrated with d- or l-menthol at 15 °C.

## Phase-separated Structures at Room Temperature

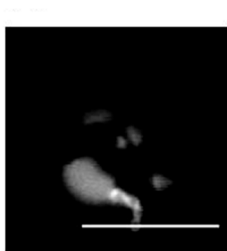

**Figure S4.** Typical microscopic image of reverse domain formation. Scale bar = 10  $\mu\text{m}$ .
